# Supplementary material for: RETRACTED: Inhibition of EphA2 by Dasatinib Suppresses Radiation-Induced Intestinal Injury
Source: PubMed Central journal article supplement (PMC7730170; doi:10.3390/ijms21239096), 2020-11-30
Supplement: ijms-21-09096-s001.pdf [file ijms-21-09096-s001.pdf]

## Supplementary data1

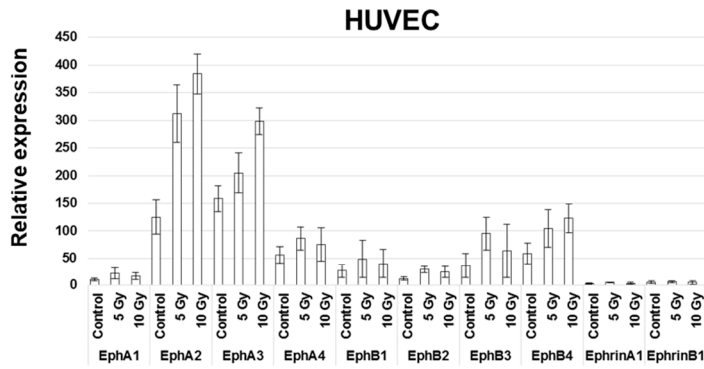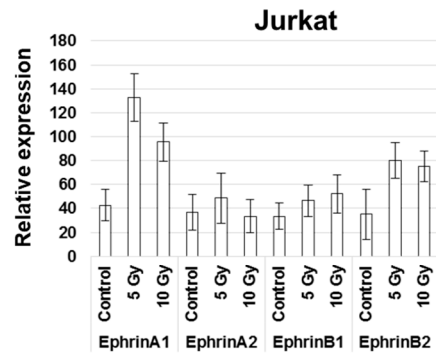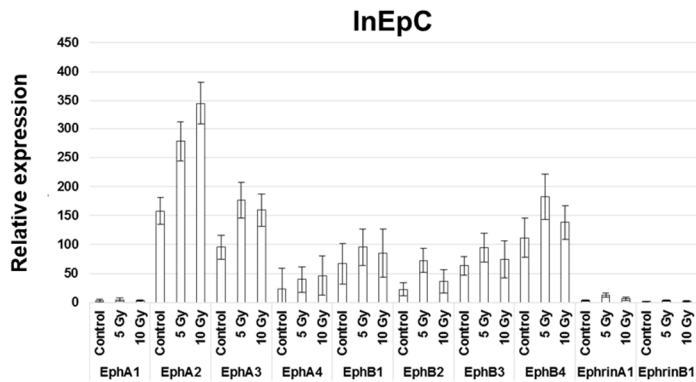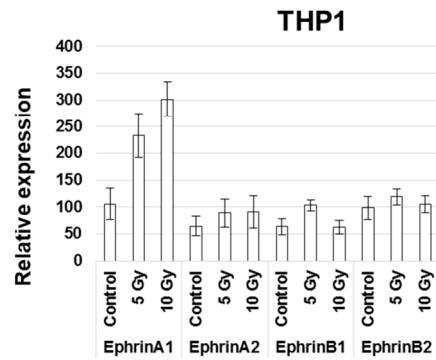

## Supplementary Data 1

HUVECs, InEpCs, Jurkat cells, and THP1 cells were exposed to IR at doses of 5 Gy and 10 Gy. After 24 hours, the expression levels of Eph receptors and ephrin ligands were analyzed in these cells using qPCR.

## Supplementary Data 2

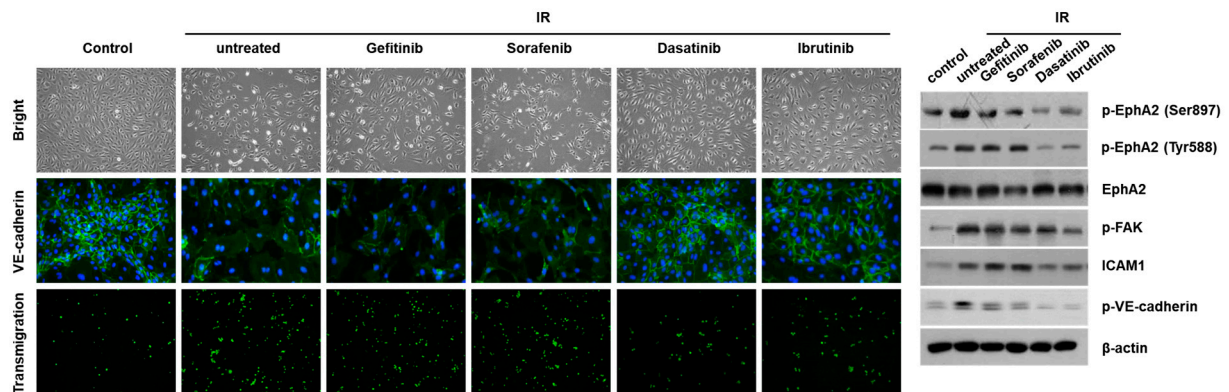

## Supplementary Data 2

HUVECs were exposed to IR at a dose of 5 Gy and then incubated with the indicated tyrosine kinase inhibitors for 24 hours. Representative images show the morphology (Bright), VE-cadherin expression, and adhesion to CFSE-labeled THP1 cells (Transmigration). The expression of p-EphA2 (Tyr588 and Ser897), EphA2, p-FAK, ICAM1, p-VE-cadherin, and  $\beta$ -actin were measured by western blotting analysis.

### Supplementary Data 3

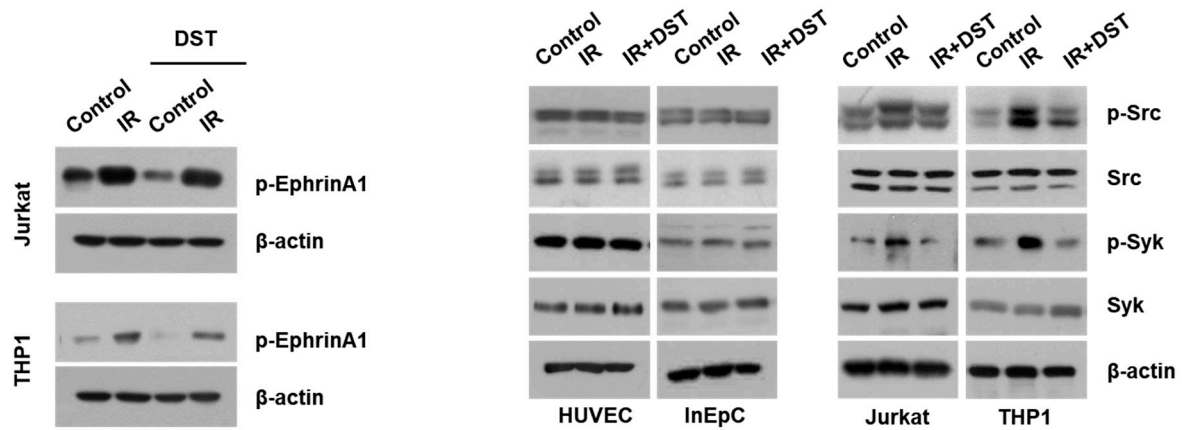

### Supplementary Data 3

HUVECs, InEpCs, Jurkat cells, and THP1 cells were exposed to radiation (5 Gy) and dasatinib (500nM) for 24 hours. p-EphrinA1 expression was determined by western blotting.  $\beta$ -actin was used as a protein loading control (left panel). Expression levels of p-Src, Src, p-Syk, Syk, and  $\beta$ -actin were measured by western blotting (right panel).

**Supplementary Table 1. qPCR primers for measurement of gene expression**

| Gene name | Forward Primer           | Reverse Primer           |
|-----------|--------------------------|--------------------------|
| EphA1     | ATCTTTGGGCTGCTGCTTGG     | GCTTGTCTCTCGATCCACATC    |
| EphA2     | CCCGAGTGTCCATTCGGCTAC    | TCACTTGGTCTTTGAGTCCCAG   |
| EphA3     | AGTCTGAAGATCATCACAAGC    | CACATCCTTCCAGTACTTTACAC  |
| EphA4     | AGTTCCAGACCGAACACAGCCTTG | GCCATGCATCTGCTGCATCTG    |
| EphB1     | ACCATCACCGCTGTGCCTTCC    | TTCTCATGCCATTACCGACGGTGA |
| EphB2     | CACTACTGGACCGCACGATAC    | TCTACCGACTGGATCTGGTCCA   |
| EphB3     | CAGTGCCCCATCTGGCATGT     | CTTAGCAGATCTTCTGCAGTCA   |
| EphB4     | TACGTCTCTAACCTCCCATCT    | GCTGGTCACCCTTTCTCTTT     |
| EphrinA1  | CCAACATTACGAGGACGACTCT   | GGGCTCGCATGTCACATACTC    |
| EphrinA2  | AGTCTACTGGAACCGCAGCAA    | TAGCCGCCGCCATCAC         |
| EphrinB1  | CGTAACGCCTGAGCAGTTGA     | AGCCTGTGTGGCTGTCTTGAC    |
| EphrinB2  | CCTACAGAGCACATGGAAACGA   | GCCAGAGAGATCCCATCAATTC   |
